# Supplementary material for: Selective integration of diverse taste inputs within a single taste modality
Source: eLife. 2023 Jan 24;12:e84856. doi: 10.7554/eLife.84856 (PMC9873257; doi:10.7554/eLife.84856)
Supplement: Figure 1—source data 1. [file elife-84856-fig1-data1.xlsx]

## Sheet: Sheet1
Gal4 line	leg	labellum	pharynx
Gr33a-Gal4	all	all	all
Gr58c-Gal4	7/8	none	none
Gr59c-Gal4	none	S-a, I-a (13/19)	none
Gr22f-Gal4	none	S-b (3/19)	none
Gr9a-Gal4	none	none	V6 (1/~5)
