# Supplementary material for: Selective integration of diverse taste inputs within a single taste modality
Source: eLife. 2023 Jan 24;12:e84856. doi: 10.7554/eLife.84856 (PMC9873257; doi:10.7554/eLife.84856)
Supplement: Figure 5—source data 1. [file elife-84856-fig5-data1.xlsx]

## Sheet: Sheet1
	Leg	Labellum (S-a + I-a)	Labellum (S-b)	Pharynx
Suppression of PER	strong	moderate	strong	strong
Suppression of feeding	moderate	moderate	moderate	moderate
Light-induced locomotion	strong	moderate	weak	strong
Light-induced turning	moderate	moderate	no effect	strong
Post-light freezing	no effect	weak	no effect	moderate
Innate aversion	weak	moderate	no effect	strong
Learned aversion	weak	moderate	no effect	no effect
